# Supplementary material for: Identification of MFGE8 and KLK5/7 as mediators of breast tumorigenesis and resistance to COX-2 inhibition
Source: Springer Nature journal article supplement (doi:10.1186/s13058-021-01401-2), 2021-02-15
Supplement: MOESM5 [file 18863324]

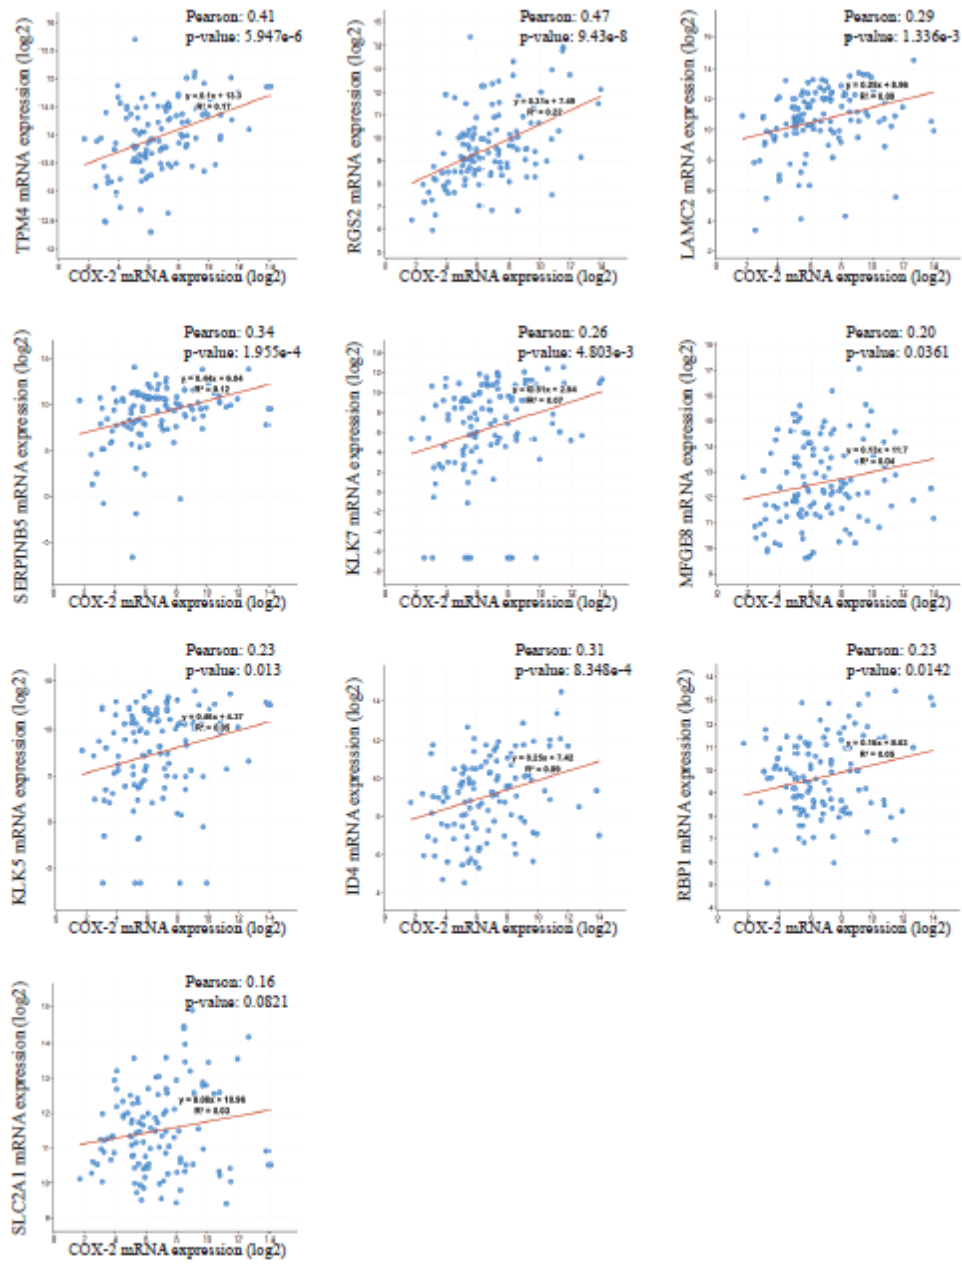

Figure S5
