# Supplementary material for: Identification of MFGE8 and KLK5/7 as mediators of breast tumorigenesis and resistance to COX-2 inhibition
Source: Springer Nature journal article supplement (doi:10.1186/s13058-021-01401-2), 2021-02-15
Supplement: MOESM6 [file 18863324]

A

| <i>CRISPR knock out in<br/>SUM159 cells</i> | <i>IC50 +/- SEM (nM)</i> | <i>P value</i> |
|---------------------------------------------|--------------------------|----------------|
| Scramble                                    | 44.19 +/- 2.05           |                |
| LAMC2                                       | 43.57 +/- 4.29           | 0.924          |
| KLK7                                        | 32.5 +/- 0.44            | 0.026          |
| MFGE8                                       | 33.01 +/- 1.73           | 0.017          |
| KLK5                                        | 35.62 +/- 3.53           | 0.119          |
| SLC2A1                                      | 36.68 +/- 0.51           | 0.068          |

B

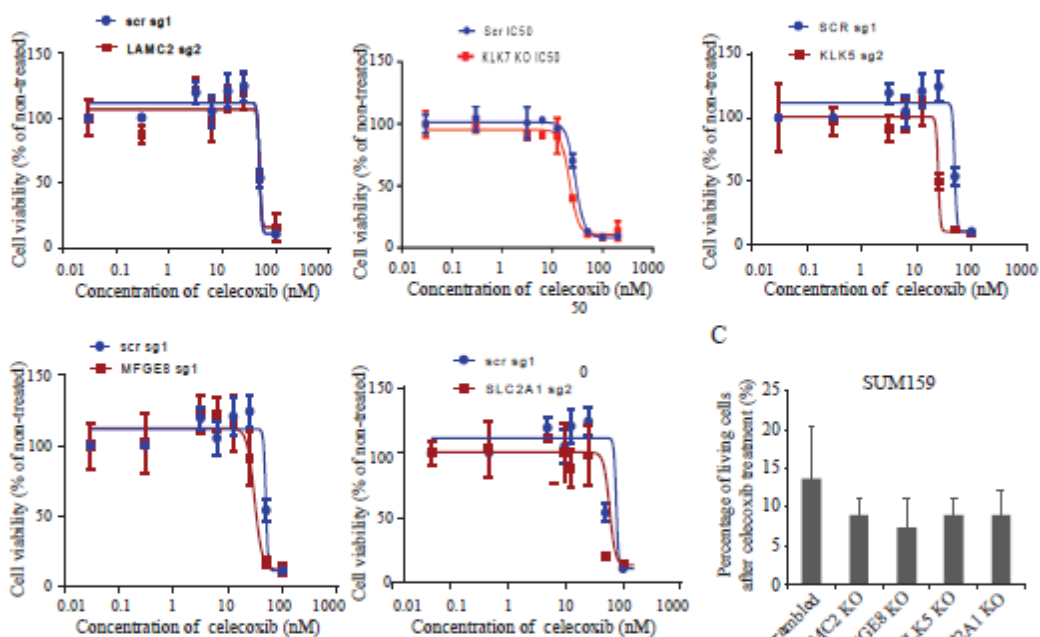

C

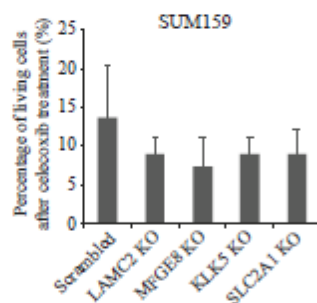

Figure S6
