# Supplementary material for: Identification of MFGE8 and KLK5/7 as mediators of breast tumorigenesis and resistance to COX-2 inhibition
Source: Springer Nature journal article supplement (doi:10.1186/s13058-021-01401-2), 2021-02-15
Supplement: MOESM8 [file 18863324]

|          |     | gRNA sequences       |
|----------|-----|----------------------|
| TPM4     | sg1 | CTCACCAGAGAACTTGCCC  |
|          | sg2 | GCTTCTCCTGCGCGTCCTTC |
| RGS2     | sg1 | AATTCTGACTCCAAGAAACG |
|          | sg2 | CAGATGGTCTTGCTGCATTC |
| LAMC2    | sg1 | TGGCAGACATCGGTCGCATC |
|          | sg2 | AGTGCTCGATGTGACAACTC |
| SERPINB5 | sg1 | CGACCAGACCAAAATCCTTG |
|          | sg2 | ATTTGATAGGGCCACTCCCT |
| KLK7     | sg1 | GCCGCAAGGGAAAGTTCCCC |
|          | sg2 | AGGGTACCTCTGCACACCAA |
| MFGE8    | sg1 | TGACCATGCCTGCGCGGTTT |
|          | sg2 | GTAGCCCTTAAGGCACGTGC |
| KLK5     | sg1 | GGCCGGGGAAGACGCCCGGT |
|          | sg2 | ACAGGGAGTAGTGGCCGAGA |
| ID4      | sg1 | GGCCGGCGCGGTGAACAAGC |
|          | sg2 | CACTGCGCTCAACCCGACC  |
| RBP1     | sg1 | GCTCATCACCTCGATCCAC  |
|          | sg2 | CCCCACCGCAGACGTCAATG |
| SLC2A1   | sg1 | CCTCGTTGCGGTTGATGAGC |
|          | sg2 | CTTCGTGTCGCCCGTGCTCA |

Supplementary Table 1
