# Supplementary material for: Identification of MFGE8 and KLK5/7 as mediators of breast tumorigenesis and resistance to COX-2 inhibition
Source: Springer Nature journal article supplement (doi:10.1186/s13058-021-01401-2), 2021-02-15
Supplement: MOESM9 [file 18863324]

| Gene name |     | Forward primer           | Reverse primer           |
|-----------|-----|--------------------------|--------------------------|
| TPM4      | sg1 | AAGATCGGCCACTGCACTC      | GAGAGCTGAAAAAGCTGGTGCC   |
|           | sg2 | CGCCTTCTCCTCCTCCTT       | TGGTCCTCAGGACGAGGGAA     |
| RGS2      | sg1 | CAAGGTCAGTCTTTATGGCAGGTC | AGGAGGGGTAAAAAGTCCCTCCA  |
|           | sg2 | CTAGCCCGCTTTGTCCTTGATTAC | CAGGTGGGGAAGAAAATCAGCC   |
| LAMC2     | sg1 | GGTGATAGTTGCTTCCAATGCCG  | CTCACCGGTAACATCAGGCAAC   |
|           | sg2 | GCAGCAGATGGTGCTTCTTACTTC | TCCCAACCTCTTAGGGGTATTGTG |
| SERPINB5  | sg1 | ATGCCCCACTCTGTCCCTATC    | CTTCTTTCTTCCCTGCTCCTTC   |
|           | sg2 | ACCATGGCCAATGCCAAGGTC    | GGCTTCTGATCCAGCAACATTAG  |
| KLK7      | sg1 | GCGTCTCACTCCTGTGCAT      | CCCTTCTCTGCAATTGGTCTC    |
|           | sg2 | AACTCAGTGTGGCGTTAGCGATG  | GGAGCAGGGTCTTAACATTGG    |
| MFGE8     | sg1 | AACCCAGTGATGAACCCCTCC    | TGCCTTCATTGCCCTTTGTGGTC  |
|           | sg2 | TCTCACTGTGTCCCCAGCT      | TGCATCAGCATCAGGCCTGG     |
| KLK5      | sg1 | ACTTCTTCTGCAGTGGGCG      | TACCTGAGCCTGGGCTCTGT     |
|           | sg2 | GGGTCTGACATCTTAGTGGGACG  | GGTGGGTTGGAGATGGTTG      |
| ID4       | sg1 | TGCTCTCAGAAACGCTGGGG     | TCAACACCGACCCGGTGAGA     |
|           | sg2 | CGTTATCGACTACATCCTGGACC  | TCCTCGGAAATCAGGCTGGC     |
| RBP1      | sg1 | TATCAAGTTTGGGAGCTGCCCCCT | GCAAAAGGGCTTAGCTCATTGCTG |
|           | sg2 | TCTATGCCTGTCAGATCCTCCTC  | ATGTCTGCTCGTTGGCCCTG     |
| SLC2A1    | sg1 | TGTCCCGCGCAGCTTCTTTAG    | CATGTGACCGATGAGGAACTGAG  |
|           | sg2 | GTGGGAGGTAGGGGAGACTT     | TGGGCGGAAGAGAACTCTGC     |

Supplementary Table 2
